# Supplementary material for: Geometrical isomerism in pentadecanuclear high-spin Ni9W6 clusters with symmetrical bidentate ligands detected
Source: Royal Society of Chemistry journal article supplement (doi:10.1039/c2ce25537e), 2012-01-01
Supplement: c2ce25537e.pdf [file c2ce25537e.pdf]

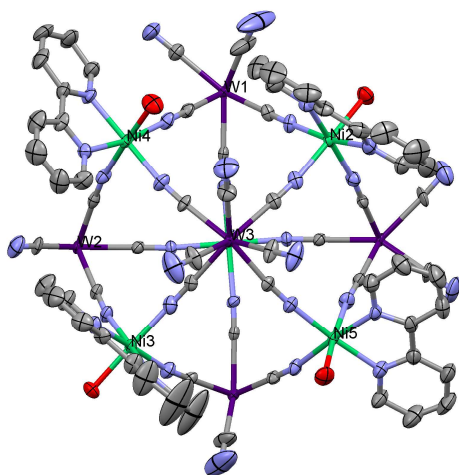

**1a isomer III**

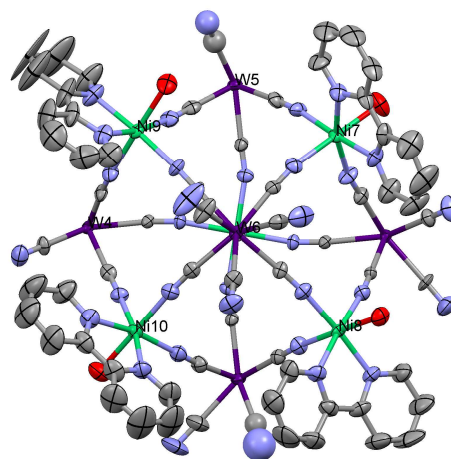

**1a isomer IV**

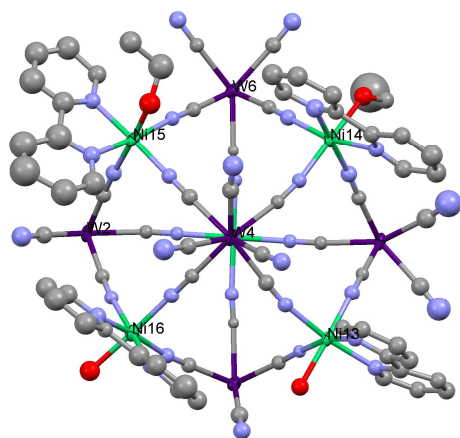

**1b isomer III**

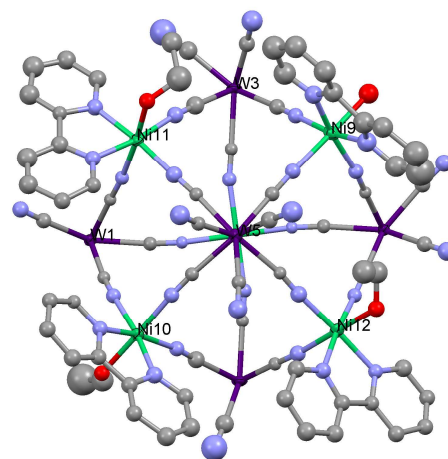

**1b isomer IV**

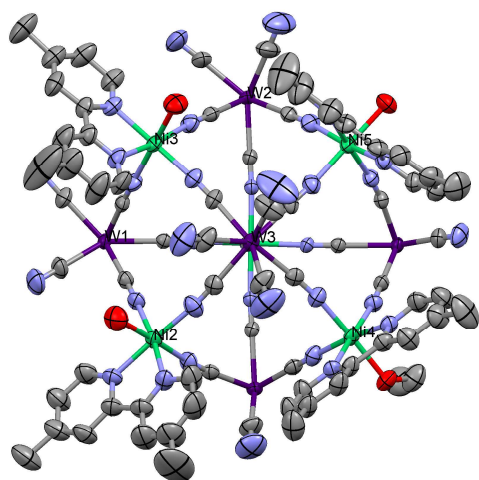

**2a isomer VI**

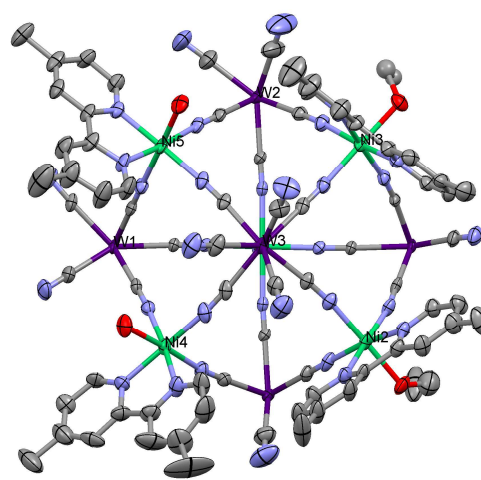

**2b isomer VI**

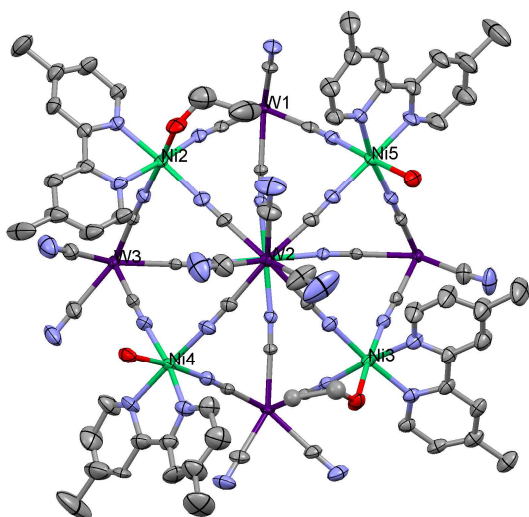

**2b** isomer II

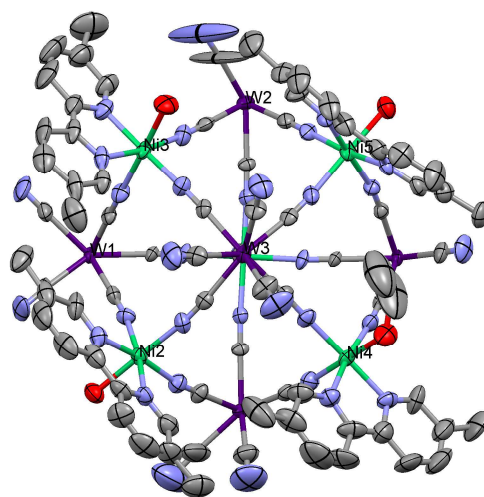

**3a** isomer IV

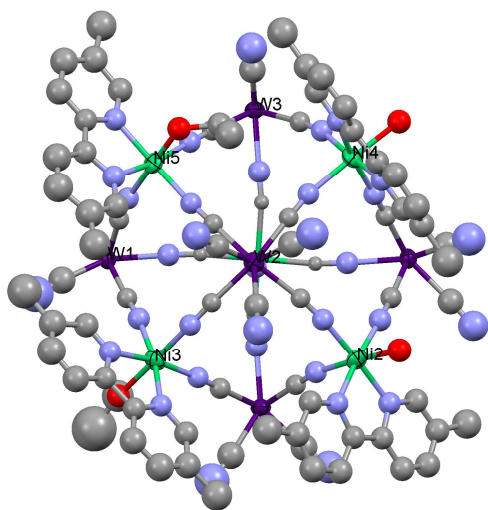

**3b** isomer IV

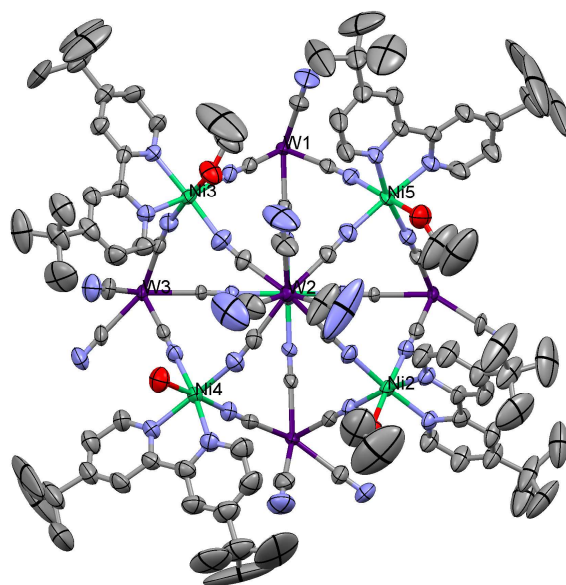

**4** isomer II

**Fig. S1** Structures of clusters in compounds **1-4** with principal atom numbering. Thermal ellipsoids at 50% probability (balls for isotropically refined atoms). One half of centrosymmetric clusters is shown for clarity. The orientation of the clusters has been chosen to emphasise their geometrical isomerism.

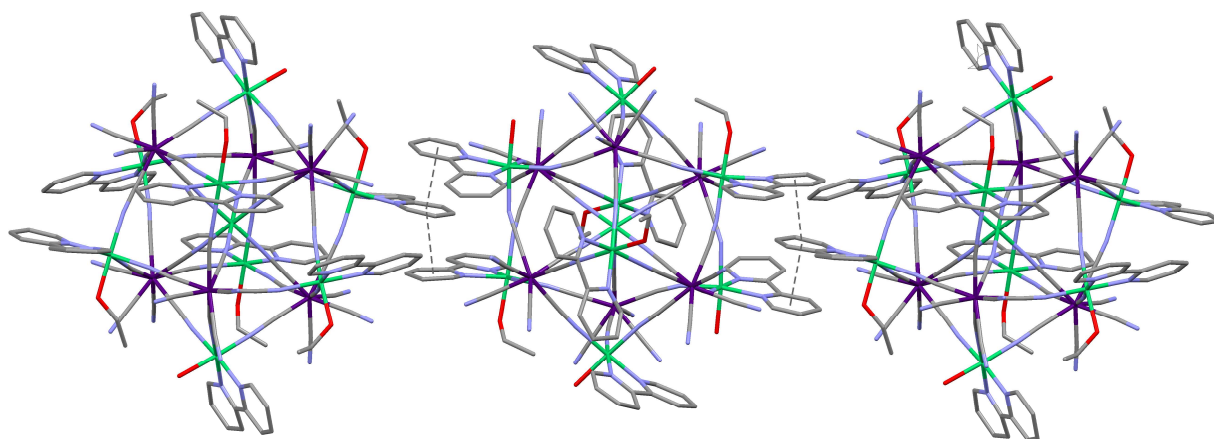

**Fig. S2**  $\pi$ - $\pi$  interactions in the structure of **1b**.

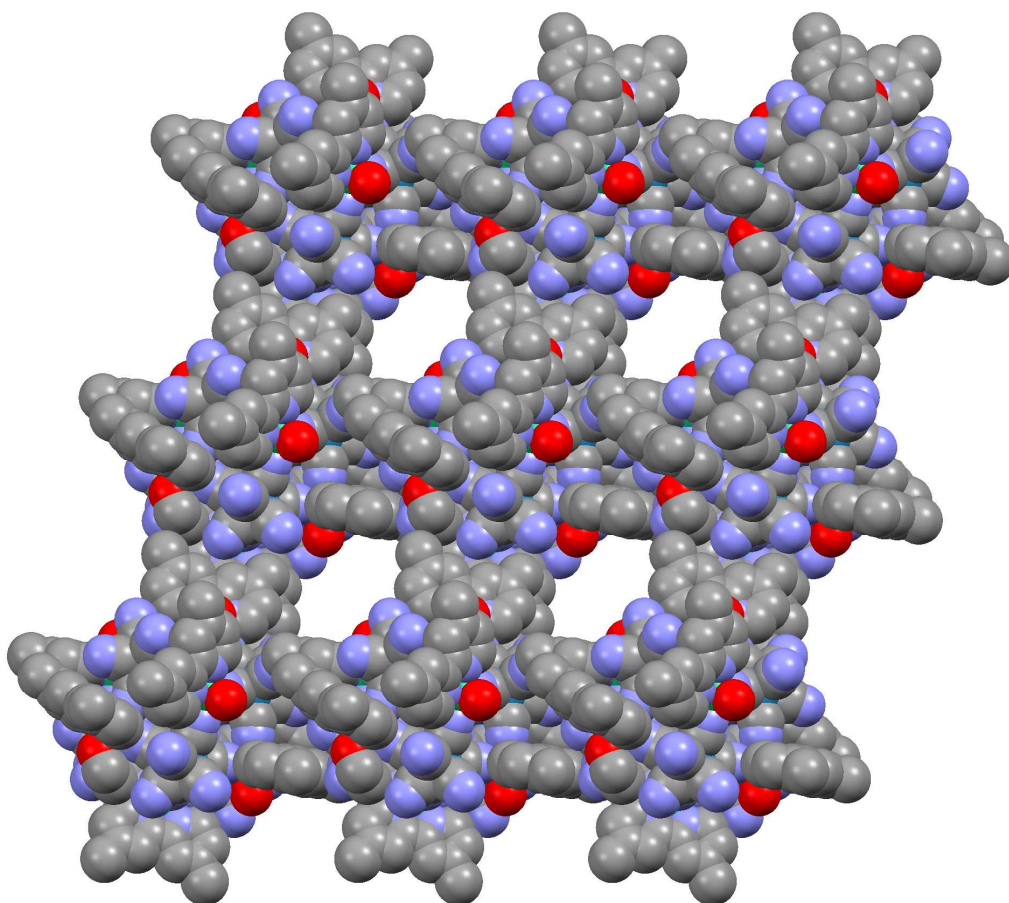

**Fig. S3** Channels in the structure of **2a**, view along a axis.

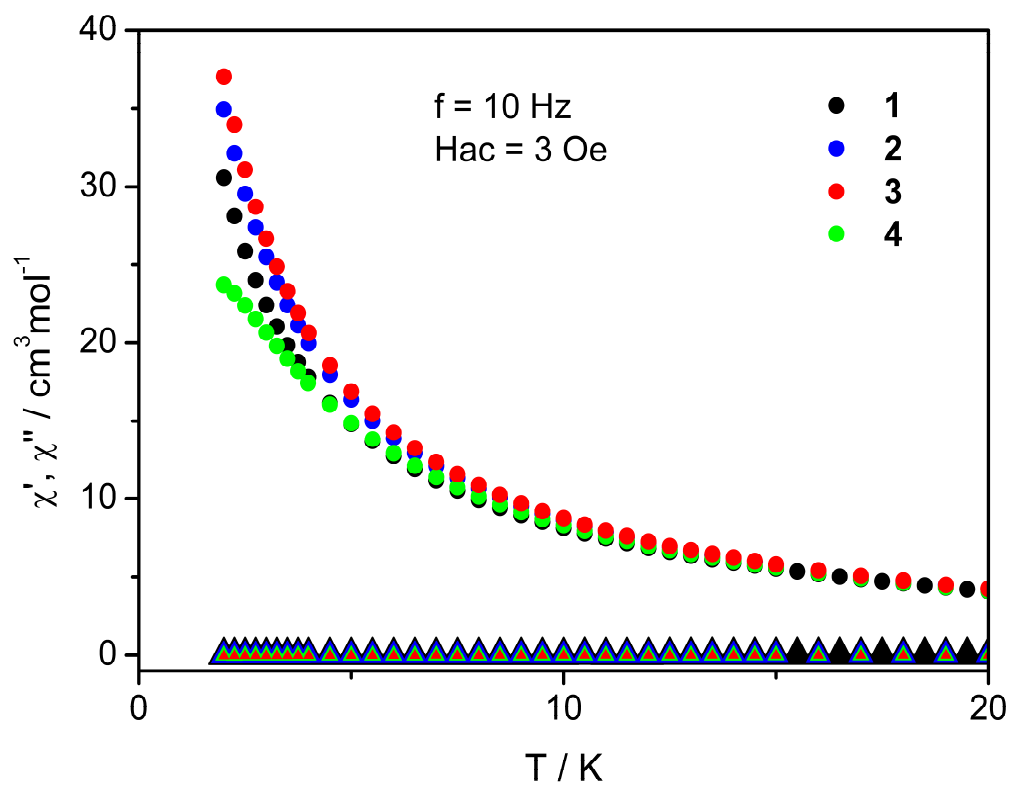

Fig. S4 AC susceptibility of samples 1-4;  $\chi'$  - circles,  $\chi''$  - triangles.

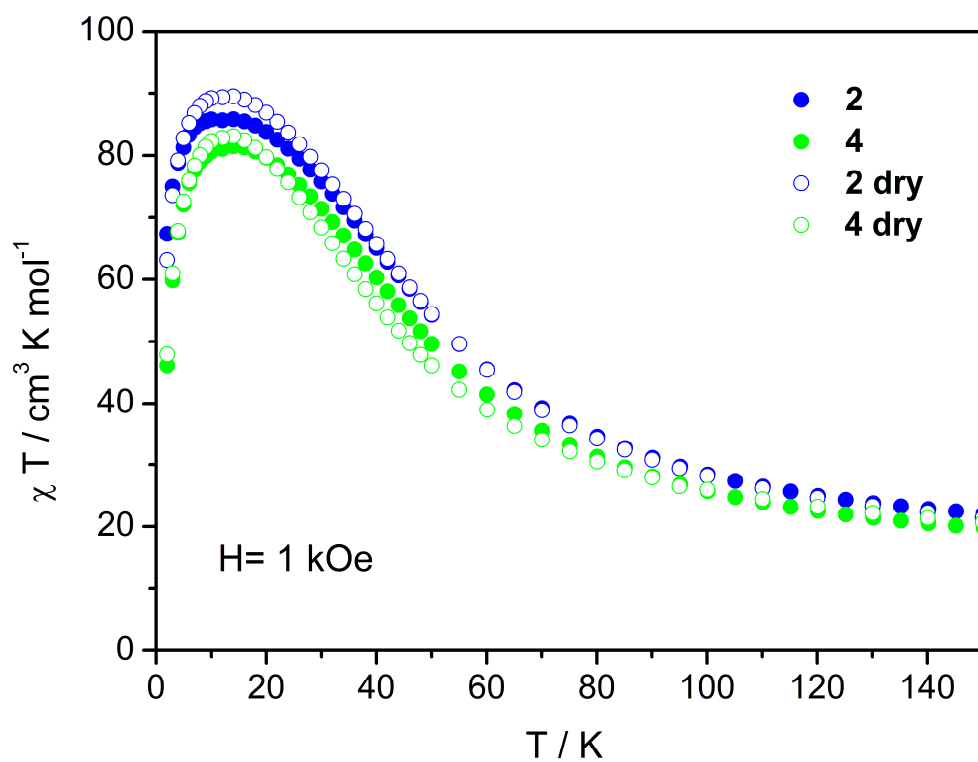

Fig. S5 Comparison of  $\chi T$  vs.  $T$  plots for samples covered in EtOH-H<sub>2</sub>O 1:1 mixture and dry samples of 2 and 4.

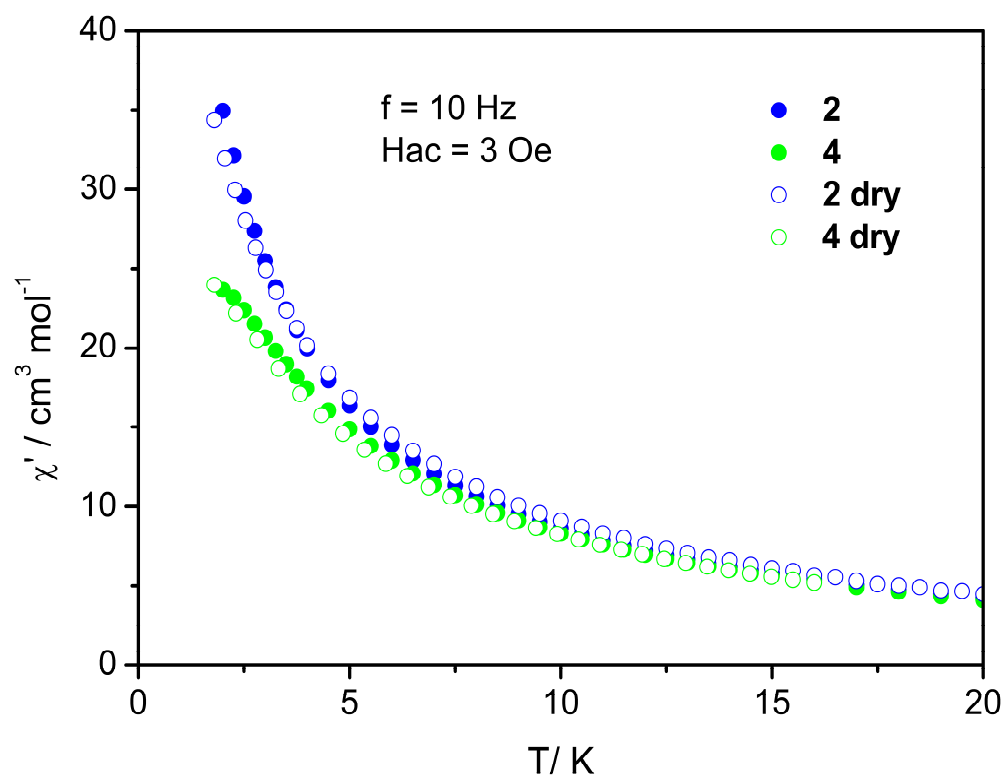

**Fig. S6** Comparison of AC measurements for samples covered in EtOH-H<sub>2</sub>O 1:1 mixture and dry samples of **2** and **4**.
